# Supplementary material for: Enrolling and retaining a representative population in the NIH Researching COVID to Enhance Recovery (RECOVER)-Adult Cohort
Source: Research Square preprint supplement (doi:10.21203/rs.3.rs-10092514/v1), 2026-07-06
Supplement: Supplementary file 1 [file 2b8e1f16ce93248e1f50b66a.docx]

**Supplementary Materials**

| **Supplementary table 1**. Distribution, counts, and frequencies of study time (months), number of completed follow-up visits (n=13,733), and reasons for withdrawal of adult participants (n=14,527) in the RECOVER-Adult cohort | |
| --- | --- |
| **Study time (months),** Mean (SD) | 29.1 (12.0) |
|  |  |
|  |  |
| **Number of completed follow-up visits,** Mean (SD) | 9.35 (3.77) |
| **Number of completed follow-up visits** |  |
| 1-6 | 3114 (22.7%) |
| 7-12 | 7538 (54.9%) |
| 13-18 | 3080 (22.4%) |
| 19-24 | 1 (0.007%) |
|  |  |
| **Reasons for withdrawal, n(%)** |  |
| Lost to follow-up | 1984 (63.0%) |
| Moved out of range of study | 87 (2.8%) |
| Participant declines to participate further (with or without data retention | 887 (28.2%) |
| Investigator withdrew participant | 27 (0.9%) |
| No longer eligible (e.g. incarcerated, cognitively impaired, etc.) | 20 (0.6%) |
| Deceased | 144 (4.6%) |

| **Supplementary Table 2.** Baseline Characteristics of RECOVER participants enrolled as of December 06, 2025, stratified by Hub site | | | | | | | | | | | | | | | | |
| --- | --- | --- | --- | --- | --- | --- | --- | --- | --- | --- | --- | --- | --- | --- | --- | --- |
|  | **Brigham and Women's Hospital (BWH)** | **Case Western Reserve University** | **Emory University/**  **Atlanta** | **Howard University** | **Icahn School of Medicine at Mount Sinai** | **Institute for Systems Biology** | **Stanford University** | **University of Alabama at Birmingham (UAB)** | **University of Arizona** | **University of California San Francisco** | **University of Illinois of Chicago** | **University of Texas Health Science Center at San A** | **University of Utah** | **West Virginia University** | **University of California San Francisco (Pregnancy)** | **University of Utah (Pregnancy)** |
| **(N=878)** | **(N=1200)** | **(N=920)** | **(N=468)** | **(N=1136)** | **(N=610)** | **(N=951)** | **(N=737)** | **(N=699)** | **(N=721)** | **(N=870)** | **(N=1036)** | **(N=881)** | **(N=1218)** | **(N=738)** | **(N=1427)** |
| **Age at enrollment, yr, mean[SD]** | 49.0 (16.8) | 49.2  (15.3) | 54.9  (14.2) | 50.9  (14.8) | 48.6 (15.8) | 51.4 (14.9) | 47.2  (16.5) | 47.7  (14.9) | 49.5  (15.1) | 49.1  (15.8) | 48.0  (14.1) | 49.8  (14.1) | 47.1  (15.6) | 50.8  (15.0) | 34.5  (4.31) | 32.7  (5.38) |
| **Age at enrollment**, yr, n (%) |  |  |  |  |  |  |  |  |  |  |  |  |  |  |  |  |
| 18-33 | 212 (24.1%) | 236 (19.7%) | 93  (10.1%) | 72  (15.4%) | 239 (21.0%) | 80 (13.1%) | 272 (28.6%) | 156  (21.2%) | 138 (19.7%) | 157  (21.8%) | 167  (19.2%) | 162  (15.6%) | 198 (22.5%) | 193 (15.8%) | 333  (45.1%) | 834  (58.4%) |
| 34-48 | 218 (24.8%) | 321 (26.8%) | 186 (20.2%) | 141 (30.1%) | 352 (31.0%) | 193 (31.6%) | 239 (25.1%) | 224  (30.4%) | 188 (26.9%) | 207  (28.7%) | 278  (32.0%) | 309  (29.8%) | 301 (34.2%) | 351 (28.8%) | 404  (54.7%) | 593  (41.6%) |
| 49-64 | 281 (32.0%) | 455 (37.9%) | 395 (42.9%) | 164 (35.0%) | 352 (31.0%) | 205 (33.6%) | 275 (28.9%) | 257  (34.9%) | 246 (35.2%) | 221  (30.7%) | 307  (35.3%) | 407  (39.3%) | 243 (27.6%) | 439 (36.0%) | 1  (0.1%) | 0  (0%) |
| 65-79 | 151 (17.2%) | 173 (14.4%) | 237 (25.8%) | 88  (18.8%) | 170 (15.0%) | 127 (20.8%) | 147 (15.5%) | 98  (13.3%) | 123 (17.6%) | 128  (17.8%) | 116  (13.3%) | 156  (15.1%) | 127 (14.4%) | 214 (17.6%) | 0  (0%) | 0  (0%) |
| 80+ | 16  (1.8%) | 15  (1.3%) | 9  (1.0%) | 3  (0.6%) | 23  (2.0%) | 5  (0.8%) | 18  (1.9%) | 2  (0.3%) | 4  (0.6%) | 7  (1.0%) | 2  (0.2%) | 2  (0.2%) | 12  (1.4%) | 21  (1.7%) | 0  (0%) | 0  (0%) |
| Missing | 0  (0%) | 0  (0%) | 0  (0%) | 0  (0%) | 0  (0%) | 0  (0%) | 0  (0%) | 0  (0%) | 0  (0%) | 1  (0.1%) | 0  (0%) | 0  (0%) | 0  (0%) | 0  (0%) | 0  (0%) | 0 (0%) |
| **Race/Ethnicity**, n (%) |  |  |  |  |  |  |  |  |  |  |  |  |  |  |  |  |
| Non-Hispanic White | 584 (66.5%) | 805 (67.1%) | 298 (32.4%) | 303 (64.7%) | 542 (47.7%) | 455 (74.6%) | 521 (54.8%) | 422  (57.3%) | 418 (59.8%) | 421  (58.4%) | 450  (51.7%) | 316  (30.5%) | 610 (69.2%) | 863 (70.9%) | 507  (68.7%) | 747  (52.3%) |
| Non-Hispanic Black | 94 (10.7%) | 237 (19.8%) | 510 (55.4%) | 92  (19.7%) | 202 (17.8%) | 10  (1.6%) | 41 (4.3%) | 254  (34.5%) | 7  (1.0%) | 27  (3.7%) | 194  (22.3%) | 40  (3.9%) | 21  (2.4%) | 76  (6.2%) | 32  (4.3%) | 288  (20.2%) |
| Non-Hispanic Asian | 64  (7.3%) | 41  (3.4%) | 17  (1.8%) | 19  (4.1%) | 73  (6.4%) | 38  (6.2%) | 187 (19.7%) | 10  (1.4%) | 28  (4.0%) | 100  (13.9%) | 49  (5.6%) | 18  (1.7%) | 24  (2.7%) | 65  (5.3%) | 58  (7.9%) | 55  (3.9%) |
| Hispanic | 87  (9.9%) | 68  (5.7%) | 61  (6.6%) | 39  (8.3%) | 245 (21.6%) | 48  (7.9%) | 137 (14.4%) | 21  (2.8%) | 213 (30.5%) | 127  (17.6%) | 142  (16.3%) | 629  (60.7%) | 190 (21.6%) | 127 (10.4%) | 96  (13.0%) | 253  (17.7%) |
| Two or more races | 31  (3.5%) | 30  (2.5%) | 18  (2.0%) | 9  (1.9%) | 43  (3.8%) | 35  (5.7%) | 45  (4.7%) | 19  (2.6%) | 18  (2.6%) | 38  (5.3%) | 29  (3.3%) | 24  (2.3%) | 23  (2.6%) | 52  (4.3%) | 34  (4.6%) | 51  (3.6%) |
| Other races | 6  (0.7%) | 11  (0.9%) | 10  (1.1%) | 2  (0.4%) | 19  (1.7%) | 12  (2.0%) | 13  (1.4%) | 6  (0.8%) | 14  (2.0%) | 6  (0.8%) | 4  (0.5%) | 3  (0.3%) | 11  (1.2%) | 16  (1.3%) | 4  (0.5%) | 17  (1.2%) |
| Missing | 12  (1.4%) | 8  (0.7%) | 6  (0.7%) | 4  (0.9%) | 12  (1.1%) | 12  (2.0%) | 7  (0.7%) | 5  (0.7%) | 1  (0.1%) | 2  (0.3%) | 2  (0.2%) | 6  (0.6%) | 2  (0.2%) | 19  (1.6%) | 7  (0.9%) | 16  (1.1%) |
| **Sex assigned at birth**, n (%) |  |  |  |  |  |  |  |  |  |  |  |  |  |  |  |  |
| Female/Intersex | 578 (65.8%) | 810 (67.5%) | 557 (60.5%) | 321 (68.6%) | 744 (65.5%) | 410 (67.2%) | 608 (63.9%) | 516  (70.0%) | 507 (72.5%) | 457  (63.4%) | 615  (70.7%) | 730  (70.5%) | 584 (66.3%) | 852 (70.0%) | 734 (99.5%) | 1422 (99.6%) |
| Male | 294 (33.5%) | 388 (32.3%) | 363 (39.5%) | 147 (31.4%) | 391 (34.4%) | 197 (32.3%) | 343 (36.1%) | 219  (29.7%) | 192 (27.5%) | 264  (36.6%) | 254  (29.2%) | 306  (29.5%) | 296 (33.6%) | 352 (28.9%) | 0  (0%) | 0  (0%) |
| Missing | 6  (0.7%) | 2  (0.2%) | 0  (0%) | 0  (0%) | 1  (0.1%) | 3  (0.5%) | 0  (0%) | 2  (0.3%) | 0  (0%) | 0  (0%) | 1  (0.1%) | 0  (0%) | 1  (0.1%) | 14  (1.1%) | 4  (0.5%) | 5  (0.4%) |
| **Sexual orientation**, n (%) |  |  |  |  |  |  |  |  |  |  |  |  |  |  |  |  |
| LGBTQIA+ | 103 (11.7%) | 148 (12.3%) | 110 (12.0%) | 42  (9.0%) | 178 (15.7%) | 67 (11.0%) | 92  (9.7%) | 69  (9.4%) | 70  (10.0%) | 157  (21.8%) | 89  (10.2%) | 79  (7.6%) | 113 (12.8%) | 119  (9.8%) | 71  (9.6%) | 70  (4.9%) |
| Straight | 706 (80.4%) | 1009 (84.1%) | 775 (84.2%) | 389 (83.1%) | 916 (80.6%) | 510 (83.6%) | 802 (84.3%) | 641  (87.0%) | 588 (84.1%) | 528  (73.2%) | 734  (84.4%) | 913  (88.1%) | 727 (82.5%) | 1042 (85.6%) | 646  (87.5%) | 1295  (90.7%) |
| Missing | 69  (7.9%) | 43  (3.6%) | 35  (3.8%) | 37  (7.9%) | 42  (3.7%) | 33  (5.4%) | 57  (6.0%) | 27  (3.7%) | 41  (5.9%) | 36  (5.0%) | 47  (5.4%) | 44  (4.2%) | 41  (4.7%) | 57  (4.7%) | 21  (2.8%) | 62  (4.3%) |
| **Education**, n (%) |  |  |  |  |  |  |  |  |  |  |  |  |  |  |  |  |
| Highschool or less | 78  (8.9%) | 186 (15.5%) | 163 (17.7%) | 45  (9.6%) | 139 (12.2%) | 18  (3.0%) | 68  (7.2%) | 89  (12.1%) | 55  (7.9%) | 41  (5.7%) | 119  (13.7%) | 210  (20.3%) | 70  (7.9%) | 84  (6.9%) | 43  (5.8%) | 293  (20.5%) |
| Some college/trade school | 161 (18.3%) | 346 (28.8%) | 270 (29.3%) | 67  (14.3%) | 241 (21.2%) | 114 (18.7%) | 150 (15.8%) | 224  (30.4%) | 178 (25.5%) | 120  (16.6%) | 195  (22.4%) | 352  (34.0%) | 222 (25.2%) | 255 (20.9%) | 122  (16.5%) | 346  (24.2%) |
| College degree or higher | 624 (71.1%) | 657 (54.8%) | 475 (51.6%) | 341 (72.9%) | 750 (66.0%) | 472 (77.4%) | 719 (75.6%) | 418  (56.7%) | 456 (65.2%) | 556  (77.1%) | 552  (63.4%) | 470  (45.4%) | 582 (66.1%) | 860 (70.6%) | 565  (76.6%) | 773  (54.2%) |
| Missing | 15  (1.7%) | 11  (0.9%) | 12  (1.3%) | 15  (3.2%) | 6  (0.5%) | 6  (1.0%) | 14  (1.5%) | 6  (0.8%) | 10  (1.4%) | 4  (0.6%) | 4  (0.5%) | 4  (0.4%) | 7  (0.8%) | 19  (1.6%) | 8  (1.1%) | 15  (1.1%) |
| **Household Income in 2019** |  |  |  |  |  |  |  |  |  |  |  |  |  |  |  |  |
| <24,999 | 104 (11.8%) | 220 (18.3%) | 222 (24.1%) | 53  (11.3%) | 152 (13.4%) | 44  (7.2%) | 108 (11.4%) | 121  (16.4%) | 78  (11.2%) | 97  (13.5%) | 167  (19.2%) | 229  (22.1%) | 118 (13.4%) | 140 (11.5%) | 59  (8.0%) | 295  (20.7%) |
| 25000 - 49999 | 92 (10.5%) | 192 (16.0%) | 132 (14.3%) | 46  (9.8%) | 118 (10.4%) | 60  (9.8%) | 72  (7.6%) | 135  (18.3%) | 101 (14.4%) | 78  (10.8%) | 141  (16.2%) | 204  (19.7%) | 120 (13.6%) | 210 (17.2%) | 73  (9.9%) | 247  (17.3%) |
| 50,000 - 74,999 | 112 (12.8%) | 157 (13.1%) | 122 (13.3%) | 49  (10.5%) | 104 (9.2%) | 72 (11.8%) | 74  (7.8%) | 125  (17.0%) | 86  (12.3%) | 59  (8.2%) | 141  (16.2%) | 169  (16.3%) | 134 (15.2%) | 175 (14.4%) | 100  (13.6%) | 146  (10.2%) |
| 75,000 - 99,999 | 83  (9.5%) | 145 (12.1%) | 94  (10.2%) | 52  (11.1%) | 102 (9.0%) | 89 (14.6%) | 87  (9.1%) | 98  (13.3%) | 97  (13.9%) | 56  (7.8%) | 96  (11.0%) | 118  (11.4%) | 103 (11.7%) | 151 (12.4%) | 83  (11.2%) | 166  (11.6%) |
| 100,000+ | 372 (42.4%) | 340 (28.3%) | 239 (26.0%) | 216 (46.2%) | 338 (29.8%) | 294 (48.2%) | 502 (52.8%) | 201  (27.3%) | 247 (35.3%) | 377  (52.3%) | 252  (29.0%) | 248  (23.9%) | 340 (38.6%) | 453 (37.2%) | 362  (49.1%) | 447  (31.3%) |
| Missing | 115 (13.1%) | 146 (12.2%) | 111  (12.1%) | 52  (11.1%) | 322 (28.3%) | 51  (8.4%) | 108 (11.4%) | 57  (7.7%) | 90  (12.9%) | 54  (7.5%) | 73  (8.4%) | 68  (6.6%) | 66  (7.5%) | 89  (7.3%) | 61  (8.3%) | 126  (8.8%) |
| **Marital Status** |  |  |  |  |  |  |  |  |  |  |  |  |  |  |  |  |
| Divorced, widowed, separated, or never married | 345 (39.3%) | 506 (42.2%) | 475 (51.6%) | 175 (37.4%) | 469 (41.3%) | 202 (33.1%) | 343 (36.1%) | 293  (39.8%) | 235 (33.6%) | 328  (45.5%) | 396  (45.5%) | 432  (41.7%) | 295 (33.5%) | 430 (35.3%) | 57  (7.7%) | 266  (18.6%) |
| Married or living with partner | 486 (55.4%) | 661 (55.1%) | 418 (45.4%) | 269 (57.5%) | 425 (37.4%) | 395 (64.8%) | 580 (61.0%) | 432  (58.6%) | 414 (59.2%) | 383  (53.1%) | 444  (51.0%) | 588  (56.8%) | 567 (64.4%) | 764 (62.7%) | 644  (87.3%) | 1113  (78.0%) |
| Missing | 47  (5.4%) | 33  (2.8%) | 27  (2.9%) | 24  (5.1%) | 242 (21.3%) | 13  (2.1%) | 28  (2.9%) | 12  (1.6%) | 50  (7.2%) | 10  (1.4%) | 30  (3.4%) | 16  (1.5%) | 19  (2.2%) | 24  (2.0%) | 37  (5.0%) | 48  (3.4%) |
| **Insurance Status** |  |  |  |  |  |  |  |  |  |  |  |  |  |  |  |  |
| Yes | 825 (94.0%) | 1124 (93.7%) | 823 (89.5%) | 428 (91.5%) | 884 (77.8%) | 586 (96.1%) | 913 (96.0%) | 700 (95.0%) | 629 (90.0%) | 698 (96.8%) | 797 (91.6%) | 878 (84.7%) | 836 (94.9%) | 1163 (95.5%) | 684 (92.7%) | 1303 (91.3%) |
| No | 1  (0.1%) | 27 (2.3%) | 55 (6.0%) | 17 (3.6%) | 11 (1.0%) | 9 (1.5%) | 7 (0.7%) | 16 (2.2%) | 15 (2.1%) | 13 (1.8%) | 36 (4.1%) | 118 (11.4%) | 21 (2.4%) | 27 (2.2%) | 14 (1.9%) | 63 (4.4%) |
| Missing | 52  (5.9%) | 49 (4.1%) | 42 (4.6%) | 23 (4.9%) | 241 (21.2%) | 15 (2.5%) | 31 (3.3%) | 21 (2.8%) | 55 (7.9%) | 10 (1.4%) | 37 (4.3%) | 40 (3.9%) | 24 (2.7%) | 28 (2.3%) | 40 (5.4%) | 61 (4.3%) |
| **Employment Status** |  |  |  |  |  |  |  |  |  |  |  |  |  |  |  |  |
| Employed | 566 (64.5%) | 799 (66.6%) | 467 (50.8%) | 296 (63.2%) | 578 (50.9%) | 395 (64.8%) | 590 (62.0%) | 509  (69.1%) | 452 (64.7%) | 463  (64.2%) | 554  (63.7%) | 655  (63.2%) | 581 (65.9%) | 828 (68.0%) | 512  (69.4%) | 968  (67.8%) |
| Unemployed | 25  (2.8%) | 33  (2.8%) | 38  (4.1%) | 17  (3.6%) | 37  (3.3%) | 12  (2.0%) | 15  (1.6%) | 12  (1.6%) | 10  (1.4%) | 35  (4.9%) | 36  (4.1%) | 35  (3.4%) | 20  (2.3%) | 23  (1.9%) | 11  (1.5%) | 50  (3.5%) |
| Missing | 31  (3.5%) | 14  (1.2%) | 9  (1.0%) | 23  (4.9%) | 209 (18.4%) | 9  (1.5%) | 17  (1.8%) | 5  (0.7%) | 43  (6.2%) | 2  (0.3%) | 7  (0.8%) | 2  (0.2%) | 11  (1.2%) | 13  (1.1%) | 35  (4.7%) | 22  (1.5%) |
| **Living in an Underserved Area** |  |  |  |  |  |  |  |  |  |  |  |  |  |  |  |  |
| Yes | 122 (13.9%) | 295 (24.6%) | 159 (17.3%) | 88  (18.8%) | 390 (34.3%) | 82 (13.4%) | 6  (0.6%) | 507  (68.8%) | 132 (18.9%) | 143  (19.8%) | 486  (55.9%) | 379  (36.6%) | 214 (24.3%) | 438 (36.0%) | 197  (26.7%) | 121  (8.5%) |
| No | 756 (86.1%) | 905 (75.4%) | 761 (82.7%) | 380 (81.2%) | 746 (65.7%) | 528 (86.6%) | 945 (99.4%) | 230  (31.2%) | 567 (81.1%) | 578  (80.2%) | 384  (44.1%) | 657  (63.4%) | 667 (75.7%) | 780 (64.0%) | 541  (73.3%) | 1306  (91.5%) |
| **Primary Language** |  |  |  |  |  |  |  |  |  |  |  |  |  |  |  |  |
| Yes | 772 (87.9%) | 1137 (94.8%) | 869 (94.5%) | 409 (87.4%) | 817 (71.9%) | 573 (93.9%) | 826 (86.9%) | 714  (96.9%) | 596 (85.3%) | 670  (92.9%) | 789  (90.7%) | 958  (92.5%) | 810 (91.9%) | 1140 (93.6%) | 666  (90.2%) | 1271  (89.1%) |
| No | 73  (8.3%) | 46  (3.8%) | 40  (4.3%) | 32  (6.8%) | 100 (8.8%) | 26  (4.3%) | 105 (11.0%) | 17  (2.3%) | 59  (8.4%) | 47  (6.5%) | 75  (8.6%) | 75  (7.2%) | 60  (6.8%) | 63  (5.2%) | 37  (5.0%) | 130  (9.1%) |
| Missing | 33  (3.8%) | 17  (1.4%) | 11  (1.2%) | 27  (5.8%) | 219 (19.3%) | 11  (1.8%) | 20  (2.1%) | 6  (0.8%) | 44  (6.3%) | 4  (0.6%) | 6  (0.7%) | 3  (0.3%) | 11  (1.2%) | 15  (1.2%) | 35  (4.7%) | 26  (1.8%) |
| **Living in a Rural Area** |  |  |  |  |  |  |  |  |  |  |  |  |  |  |  |  |
| Yes | 8  (0.9%) | 84  (7.0%) | 12  (1.3%) | 0  (0%) | 5  (0.4%) | 25  (4.1%) | 12  (1.3%) | 46  (6.2%) | 81  (11.6%) | 28  (3.9%) | 5  (0.6%) | 24  (2.3%) | 16  (1.8%) | 209 (17.2%) | 49  (6.6%) | 19  (1.3%) |
| No | 870 (99.1%) | 1116 (93.0%) | 908 (98.7%) | 468  (100%) | 1131 (99.6%) | 585 (95.9%) | 939 (98.7%) | 691  (93.8%) | 618 (88.4%) | 693  (96.1%) | 865  (99.4%) | 1012  (97.7%) | 865 (98.2%) | 1009 (82.8%) | 689  (93.4%) | 1408  (98.7%) |
| **Disability Status** |  |  |  |  |  |  |  |  |  |  |  |  |  |  |  |  |
| Yes | 187 (21.3%) | 295 (24.6%) | 256 (27.8%) | 98  (20.9%) | 223 (19.6%) | 121 (19.8%) | 188 (19.8%) | 200  (27.1%) | 137 (19.6%) | 163  (22.6%) | 202  (23.2%) | 300  (29.0%) | 222 (25.2%) | 256 (21.0%) | 83  (11.2%) | 219  (15.3%) |
| No | 626 (71.3%) | 860 (71.7%) | 635 (69.0%) | 339 (72.4%) | 639 (56.3%) | 459 (75.2%) | 720 (75.7%) | 501  (68.0%) | 499 (71.4%) | 547  (75.9%) | 628  (72.2%) | 726  (70.1%) | 631 (71.6%) | 925 (75.9%) | 591  (80.1%) | 1158  (81.1%) |
| Missing | 65  (7.4%) | 45  (3.8%) | 29  (3.2%) | 31  (6.6%) | 274 (24.1%) | 30  (4.9%) | 43  (4.5%) | 36  (4.9%) | 63  (9.0%) | 11  (1.5%) | 40  (4.6%) | 10  (1.0%) | 28  (3.2%) | 37 (3.0%) | 64  (8.7%) | 50  (3.5%) |

| **Supplementary Table 3.** Completion rates of follow-up visits among RECOVER-Adult participants who completed their baseline visit, by hubsite | | | | | | |
| --- | --- | --- | --- | --- | --- | --- |
| **Site** | **Baseline** | **Follow-up Visit 1** | **Follow-up Visit 2** | **Follow-up Visit 3** | **Follow-up Visit**  **4** | **Last Visit** |
| Brigham and Women's Hospital (BWH) | 878 | 811 (93.6%) | 798 (92.9%) | 747 (88.2%) | 744 (90.0%) | 671 (95.2%) |
| Case Western Reserve University | 1200 | 1051 (90.8%) | 994 (87.7%) | 972 (88.2%) | 953 (88.2%) | 943 (94.4%) |
| Emory University/Atlanta | 920 | 834 (93.7%) | 815 (94.0%) | 769 (91.2%) | 752 (92.8%) | 695 (93.8%) |
| Howard University | 468 | 402 (89.7%) | 368 (85.4%) | 344 (81.1%) | 343 (83.1%) | 341 (91.7%) |
| Icahn School of Medicine at Mount Sinai | 1136 | 937 (83.6%) | 861 (77.8%) | 806 (73.3%) | 839 (76.8%) | 825 (83.4%) |
| Institute for Systems Biology | 610 | 566 (93.9%) | 532 (88.7%) | 496 (83.1%) | 524 (89.3%) | 518 (92.8%) |
| Stanford University | 951 | 742 (79.2%) | 663 (71.5%) | 573 (62.7%) | 582 (66.5%) | 626 (76.1%) |
| University of Alabama at Birmingham (UAB) | 737 | 628 (86.7%) | 574 (79.7%) | 568 (80.3%) | 570 (81.9%) | 471 (82.8%) |
| University of Arizona | 699 | 592 (87.6%) | 542 (80.9%) | 517 (78.1%) | 517 (79.3%) | 568 (95.1%) |
| University of California San Francisco | 721 | 667 (92.8%) | 646 (90.9%) | 619 (88.6%) | 618 (89.7%) | 627 (97.7%) |
| University of Illinois of Chicago | 870 | 782 (90.8%) | 771 (90.5%) | 773 (91.3%) | 778 (93.2%) | 745 (96.4%) |
| University of Texas Health Science Center at San A | 1036 | 982 (98.6%) | 954 (98.5%) | 939 (98.5%) | 914 (98.6%) | 875 (98.2%) |
| University of Utah | 881 | 765 (90.0%) | 733 (87.5%) | 692 (84.1%) | 698 (87.9%) | 610 (89.4%) |
| West Virginia University | 1218 | 1144 (94.5%) | 1121 (93.4%) | 1086 (91.0%) | 1053 (90.2%) | 1040 (95.6%) |
| University of California San Francisco (Pregnancy) | 738 | 532 (74.3%) | 539 (75.9%) | 520 (74.2%) | 486 (70.1%) | 475 (88.1%) |
| University of Utah (Pregnancy) | 1427 | 1322 (93.2%) | 1310 (92.6%) | 1276 (90.8%) | 1237 (89.6%) | 1257 (95.0%) |
